# Supplementary material for: Prolonged Analgesic Effect of PRF-108 and PRF-110 on Post-operative Pain in Pigs
Source: PubMed Central journal article supplement — Pain Ther. 2016 Jan 2;5(1):29–42. doi: 10.1007/s40122-015-0043-9 (PMC4912964; doi:10.1007/s40122-015-0043-9), 2016-01-02
Supplement: 40122_2015_43_MOESM1_ESM.pdf [file 40122_2015_43_MOESM1_ESM.pdf]

- The analgesic effect of PRF-108 and PRF-110 was evaluated using the swine incision model for post-operative pain.
- Significantly better analgesic activity of PRF-108 and PRF-110 compared to the commercial ropivacaine solution (Naropine<sup>®</sup>, AstraZeneca) in swine incision pain model.
- The duration of the analgesia following treatment with PRF-108 and PRF-110 was at least five-times longer than that measured following treatment with ropivacaine.
- Assessing the local concentration of PRF compounds and commercial ropivacaine solution suggests that active clearance from the injection site (the wound) is much slower for PRF-108 and PRF-110 than for the commercial ropivacaine solution.

This summary slide represents the opinions of the authors. Sponsorship for this study was funded by PainReform. For a full list of acknowledgments and disclosures for all authors of this article, please see the full text online. © The Author(s) 2015. Creative Commons Attribution Noncommercial License (CC BY-NC).
